# Supplementary material
Source: PubMed Central journal article supplement (PMC6625885)
Supplement: NIHMS1527192-supplement-204_2019_2453_MOESM1_ESM.pdf [file NIHMS1527192-supplement-204_2019_2453_MOESM1_ESM.pdf]

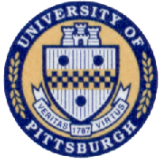

# University of Pittsburgh

## Cell Culture and Cytogenetics Facility

315 Parran Hall  
 University of Pittsburgh Graduate School of Public Health  
 130 DeSoto Street  
 Pittsburgh, PA 15261  
 (412) 624-5358

--For Research Purposes Only--

Lab Number: CCSG1550 Date of Submitted: 12/21/16  
 Date of Report: 1/10/17

Specimen: One DNA sample Submitted by: Weimin Gao, M.D., Ph.D.  
 Indication: STR Profiling Technologist: Dale Lewis, B.S., CG(ASCP)<sup>CM</sup>

**Results and Interpretation:** This DNA specimen was studied using the Promega GenePrint 10 Amplification Kit.

|            | GAO   |
|------------|-------|
| Amelogenin | X,Y   |
| CSFIPO     | 10,12 |
| D13S317    | 11,11 |
| D16S539    | 11,12 |
| D21S11     | 29,29 |
| D5S818     | 11,11 |
| D7S820     | 8,11  |
| TH01       | 8,9.3 |
| TPOX       | 8,11  |
| V WA       | 14,14 |
| EV         | 1.0   |

Online verification is available using the DSMZ Online STR Analysis site (<http://www.dsmz.de/services/services-human-and-animal-cell-lines/online-str-analysis.html>). The EV, the identity relationship between two cell lines or a cell line with a database entry (A and B) is calculated as the (Number of coincident peaks of STR profiles between A and B) x 2 / (Total number of peaks of STR profiles in A and B). EV values greater than 0.9 indicate that the two cell lines are derived from the same origin ([Sugimoto et al. \(2013\) Cancer Lett 331, 115-121](#)).

Sample "Gao" matches the expected database profile for A549 with an evaluation value (EV) of 1.0 (36/36). This confirms the identity of this cell line.

The following acknowledgement should be included when publishing these findings: These genetic studies were carried out in the University of Pittsburgh Cell Culture and Cytogenetics Facility.

---

Susanne M. Gollin, Ph.D., FFACMG  
 Laboratory Director

---

Dale W. Lewis, B.S., CG(ASCP)<sup>CM</sup>  
 Senior Technologist

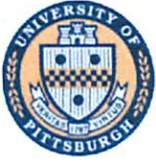

# University of Pittsburgh

## Cell Culture and Cytogenetics Facility

3060 Parran Hall Lab Annex  
 University of Pittsburgh Graduate School of Public Health  
 130 DeSoto Street  
 Pittsburgh, PA 15261  
 (412) 624-5358

--For Research Purposes Only--

Lab Number: CCSG1594 Date of Submitted: 5/19/17  
 Date of Report: 5/24/17

Specimen: Two DNA samples Submitted by: Weimin Gao, Ph.D.

Indication: STR Profiling Technologist: Dale Lewis, B.S., CG(ASCP)<sup>CM</sup>

**Results and Interpretation:** This DNA specimen was studied using the Promega GenePrint 10 Amplification Kit.

|            | Sample 1            | Sample 2              |
|------------|---------------------|-----------------------|
| Amelogenin | X,X                 | X,X                   |
| CSFIPO     | 11,11               | 12,12                 |
| D13S317    | 11,11               | 9,10,14               |
| D16S539    | 11,12               | 9,12                  |
| D21S11     | 30,30               | 28,28                 |
| D5S818     | 11,11               | 11,12                 |
| D7S820     | 8,9                 | 8,8                   |
| TH01       | 9.3,9.3             | 7,7                   |
| TPOX       | 11,11               | 8,11                  |
| V WA       | 18,18               | 18,18                 |
| % Match    | 100% with NCI-H1650 | 92.31% with NCI-H1975 |

Online verification is available using the STR Analysis site ([CLIMA 2.1: the Cell Line Integrated Molecular Authentication Database 2.1 Version 2.1.201505](#)), which includes cell lines from PNAS, ATCC, JCRB, ICLC1, ICLC2, COG, and DSMZ. Percent matches of 90% or greater indicate that the two cell lines are derived from the same origin. (Romano P et al., Cell Line Data Base: structure and recent improvements towards molecular authentication of human cell lines. Nucl Acids Res 2009; 37(Database issue):D925-D932. DOI: doi:10.1093/nar/gkn730 PMID: 18927105S.)

"Sample 1" contains 100% of the expected profile alleles in the database profile for cell line NCI-H1650. This confirms the identity of this cell line.

"Sample 2" contains 92.31% of the expected profile alleles in the database profile for cell line NCI-H1975. Allele D13S317 had a noisy fragment size analysis that likely accounts for the discrepancy. The 92.31% match confirms the identity of this cell line.

The following acknowledgement should be included when publishing: These genetic studies were carried out in the University of Pittsburgh Cell Culture and Cytogenetics Facility.

Susanne M. Gollin, Ph.D., FFACMG  
 Laboratory Director

Dale W. Lewis, B.S., CG(ASCP)<sup>CM</sup>  
 Senior Technologist
